# Supplementary material for: The Circulating GRP78/BiP Is a Marker of Metabolic Diseases and Atherosclerosis: Bringing Endoplasmic Reticulum Stress into the Clinical Scenario
Source: MDPI journal article supplement (doi:10.3390/jcm8111793), 2019-10-26
Supplement: s1 [file s1]

## Supplemental Material

**Supplemental Table S1: Crude and adjusted models used to assess the association between the log-GRP78/BiP and metabolic status.**

|                  | Group       |             | Obesity  |  | Type 2 Diabetes |             | Metabolic Syndrome |  |
|------------------|-------------|-------------|----------|--|-----------------|-------------|--------------------|--|
|                  | OR (95% CI) |             | <i>p</i> |  | OR (95% CI)     |             | <i>P</i>           |  |
| Crude model      | 2.86        | (1.70–4.82) | <0.001   |  | 4.24            | (2.24–8.00) | <0.001             |  |
| Adjusted model 1 | 2.86        | (1.69–4.80) | <0.001   |  | 4.46            | (2.26–8.79) | <0.001             |  |
| Adjusted model 2 | 1.56        | (0.85–2.80) | 0.157    |  | 2.26            | (1.07–4.76) | 0.033              |  |

Logistic regression models (odds ratio; OR and 95% confidence interval; CI). Model 1 was adjusted by age and gender, and model 2 was adjusted by age, gender, BMI (not included in obesity), glucose (not included in type 2 diabetes), total cholesterol, apoB100, Apo A1, total triglycerides, and systolic BP. GRP78/BiP indicates 78 kDa glucose-regulated protein/binding immunoglobulin protein, BMI, body mass index; ApoB100, apolipoprotein B100; ApoA1, apolipoprotein A1; BP, blood pressure.

**Supplemental Table S2. Variables that were significantly associated with log-GRP78/BiP in the multivariate stepwise regression analysis.**

| Independent variables     | Beta   | <i>p</i> | R <sup>2</sup> |
|---------------------------|--------|----------|----------------|
| <b>All</b>                |        |          | 0.327          |
| Gender                    | −0.197 | 0.002    |                |
| Systolic BP               | 0.226  | 0.004    |                |
| Total triglycerides       | 0.250  | 0.001    |                |
| cIMT                      | 0.162  | 0.002    |                |
| <b>Obesity</b>            |        |          | 0.154          |
| Gender                    | −0.220 | 0.049    |                |
| <b>Type 2 diabetes</b>    |        |          | 0.253          |
| Gender                    | −0.209 | <0.001   |                |
| BMI                       | −0.019 | 0.023    |                |
| Total triglycerides       | 0.001  | 0.025    |                |
| cIMT                      | 0.395  | 0.001    |                |
| <b>Metabolic Syndrome</b> |        |          | 0.203          |
| Gender                    | −0.193 | 0.020    |                |
| Total triglycerides       | 0.269  | 0.005    |                |
| cIMT                      | 0.200  | 0.002    |                |

Linear regression models for the log-GRP78/BiP dependent variable (standardized estimates, *p*-value reported and R<sup>2</sup> for the adjusted model). The variables included were age, gender, BMI, waist circumference, glucose, total cholesterol, systolic BP, diastolic BP, total triglycerides, non-HDL-C, ApoB100, ApoA1 and cIMT. GRP78/BiP indicates 78 kDa glucose-regulated protein/binding immunoglobulin protein; BMI, body mass index; BP, blood pressure; non-HDL-C, non-HDL cholesterol; ApoB100, apolipoprotein B100; ApoA1, apolipoprotein A1; cIMT, carotid intima-media thickness.

**Supplemental Table S3.** Association between log-GRP78/BiP and atherosclerotic plaque in a subgroup of 316 patients and according to the cardiometabolic status.

|                    | OR (95% CI)         | <i>p</i> |
|--------------------|---------------------|----------|
| All                | 7.212(3.228–16.113) | <0.001   |
| Obesity            | 4.167(1.407–12.334) | 0.010    |
| Type 2 Diabetes    | 7.500(2.634–21.354) | <0.001   |
| Metabolic Syndrome | 5.004(2.083–12.024) | <0.001   |

Logistic regression models (odds ratio; OR and 95% confidence interval; CI) were adjusted by gender, BMI, total triglycerides and systolic BP. GRP78/BiP indicates 78 kDa glucose-regulated protein/binding immunoglobulin protein; BMI; body mass index and BP, blood pressure.

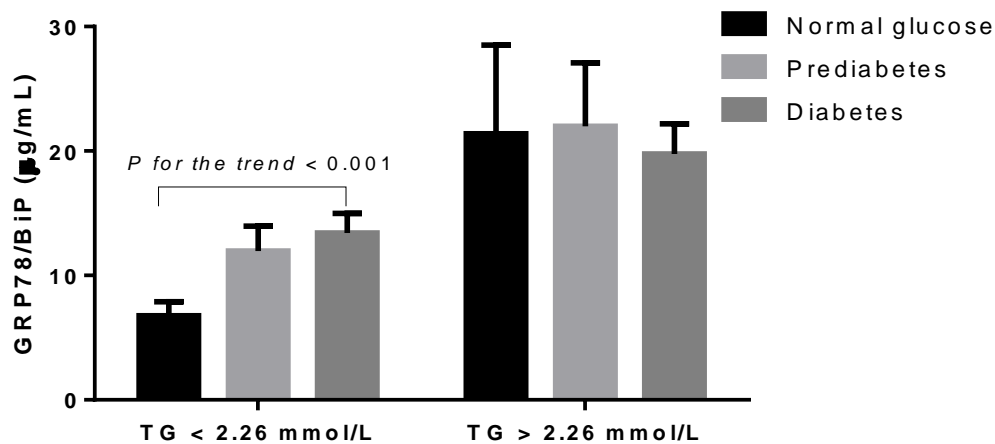

**Supplemental Figure S1.** Mean values and their SEMs of the circulating BiP/GRP78 levels across the fasting glucose categories (normal glucose < 100 mg/dL; prediabetes 100–125 mg/dL and type 2 diabetes >126 mg/dL) and triglycerides (TG < 2.26 and TG > 2.26 mmol/L). The *p* values (from the ANCOVA test adjusted for age and gender) indicate statistical significance. GRP78/BiP indicates 78 kDa glucose-regulated protein/binding immunoglobulin protein and TG, total triglycerides.
